# Supplementary material for: Nitrate as a potential prebiotic for the oral microbiome
Source: PubMed Central journal article supplement (PMC7393384; doi:10.1038/s41598-020-69931-x), 2020-07-30
Supplement: 41598_2020_69931_MOESM1_ESM.pdf [file 41598_2020_69931_MOESM1_ESM.pdf]

# Nitrate as a potential prebiotic for the oral microbiome

Rosier B.T.\* , Buetas E.\* , Moya-Gonzalvez E.M., Artacho A., Mira A.#

Department of Health and Genomics, Center for Advanced Research in Public Health, FISABIO Foundation, Avenida de Catalunya 21, 46020 Valencia (Spain)

\*First authors

#Corresponding author: [mira\\_ale@gva.es](mailto:mira_ale@gva.es)

## Supplementary files

Supplementary table 1: correlations of physiological parameters between control and nitrate conditions after 5h and 9h (n = 12)

|                   |                      | Control condition |                 |                  |                  |                  |                 |        |
|-------------------|----------------------|-------------------|-----------------|------------------|------------------|------------------|-----------------|--------|
|                   |                      | Ammonium          |                 | Lactate          |                  | pH               |                 |        |
|                   |                      | 5h                | 9h              | 5h               | 9h               | 5h               | 9h              |        |
| Nitrate condition | Nitrate <sup>a</sup> | 5h                | -0,717**        | -0,710**         | 0.491            | <b>0,795***</b>  | -0.094          | -0.140 |
|                   | Nitrite <sup>a</sup> | 5h                | -0,641*         | -0.535           | 0.401            | 0.500            | -0.563          | 0.007  |
|                   | Ammonium             | 5h                | <b>0,937***</b> | <b>0,923***</b>  | <b>-0,615*</b>   | <b>-0,790***</b> | 0.371           | -0.021 |
|                   |                      | 9h                | <b>0,811***</b> | <b>0,909***</b>  | <b>-0,762***</b> | <b>-0,734**</b>  | 0.427           | 0.077  |
|                   | Lactate              | 5h                | -0.545          | <b>-0,594*</b>   | <b>0,776***</b>  | <b>0,734**</b>   | -0.566          | -0.503 |
|                   |                      | 9h                | <b>-0,718**</b> | <b>-0,771***</b> | <b>0,883***</b>  | <b>0,932***</b>  | -0.165          | -0.277 |
|                   | pH                   | 5h                | 0.550           | 0.553            | -0.424           | -0.448           | <b>0,792***</b> | 0.172  |
|                   |                      | 9h                | -0.007          | 0.154            | 0.000            | -0.084           | <b>0,776***</b> | 0.517  |

<sup>a</sup> After 9h, there was no nitrate and nitrite detected in supernatants of 12/12 and 9/12 donors, respectively.

\* p < 0.05

\*\* p < 0.01

\*\*\* p < 0.005

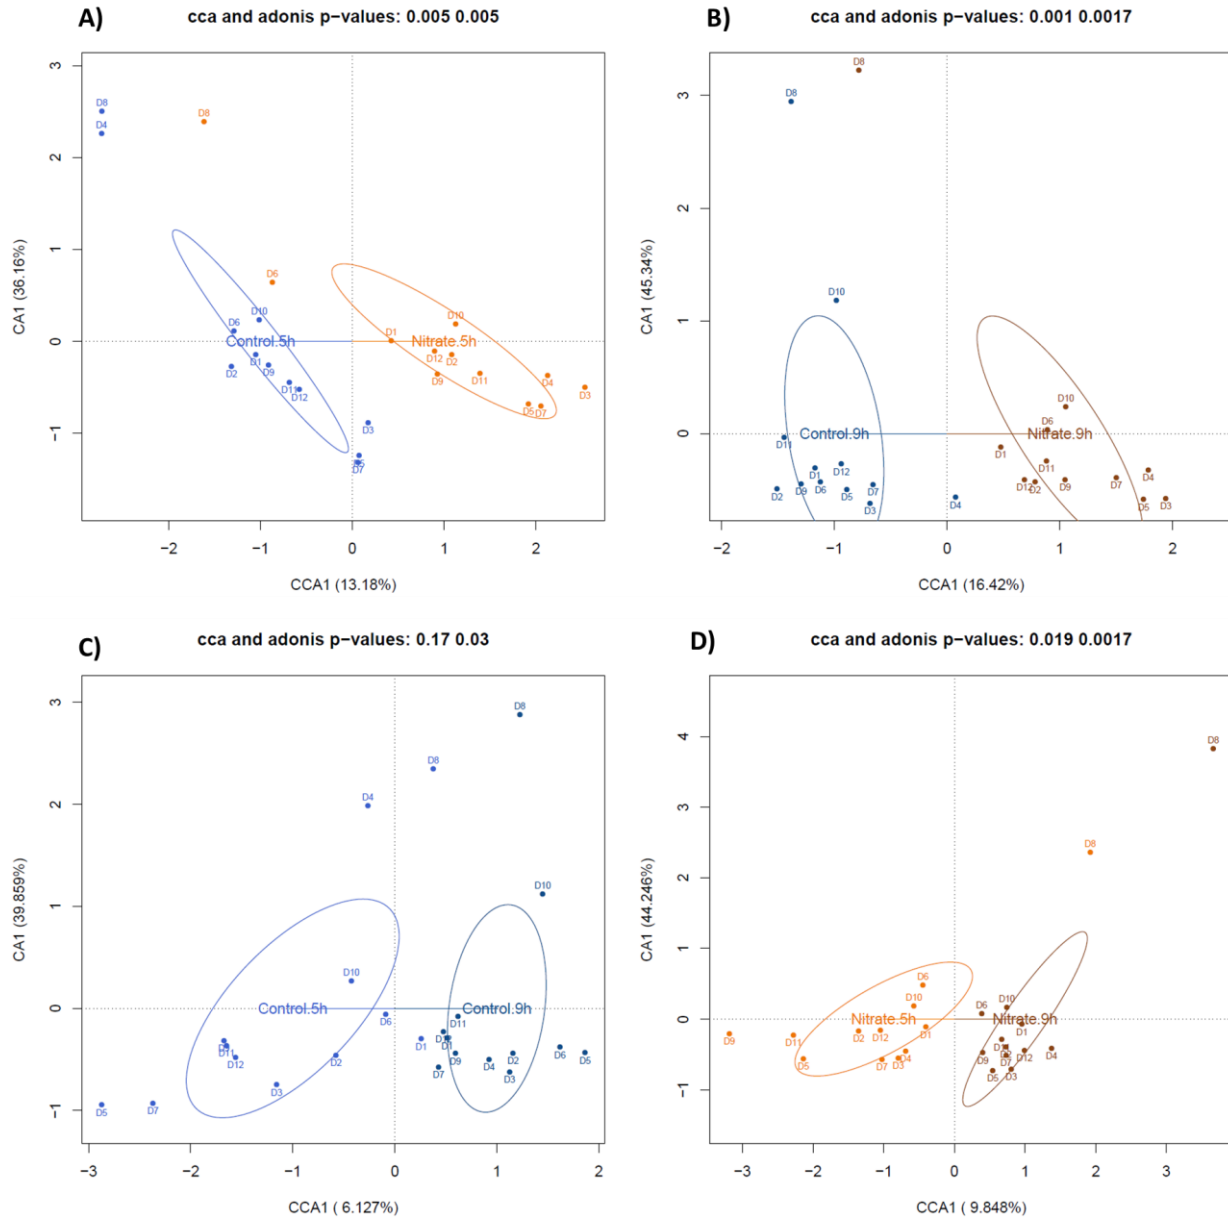

**Supplementary Fig. 1: Effect of nitrate on oral biofilm composition at 5h and 9h of *in vitro* growth (two-group comparisons).** Both Adonis and CCA p-values are significant between the control and nitrate conditions at 5h (A) and 9h (B). There were also significant differences between 5h and 9h in the control condition (CCA p-value only, C) and nitrate condition (Adonis and CCA p-values, D).

A) Inoculum average (n=4)

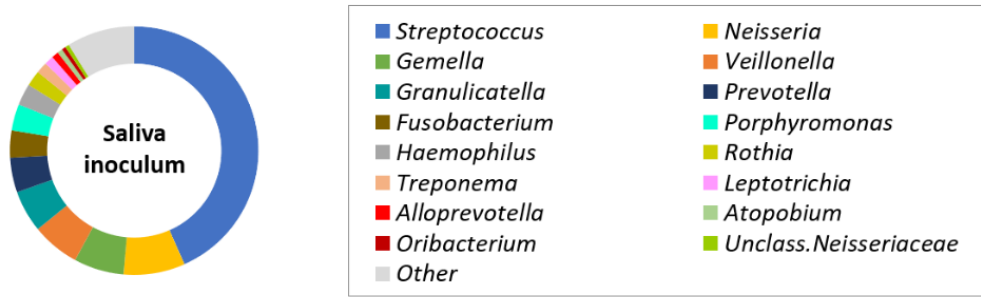

B) Individual donors after 9h

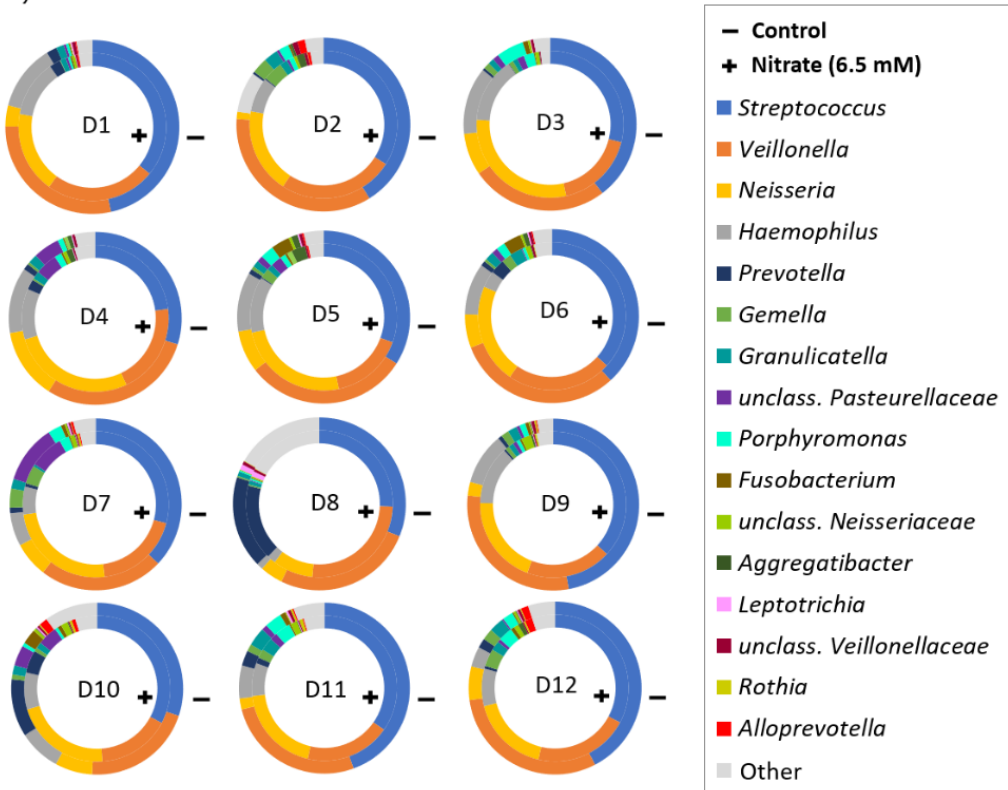

**Supplementary Fig. 2: Bacterial composition in inoculum and oral biofilms as determined by 16S rDNA sequencing.** A) Ring chart of the average relative abundance of genera in the saliva used as inoculum of donors 2, 3, 4 and 6 (n=4), which were randomly selected. B) Relative abundance of genera in biofilms of individual donors at 9h. In this figure, the outer rings are the control condition (-) and the inner rings the condition with 6.5 mM nitrate (+). Genera at <0.1% abundance are indicated as “Other” for clarity. The genera are sorted based on their maximum average abundance in one of the conditions from most to least abundant.

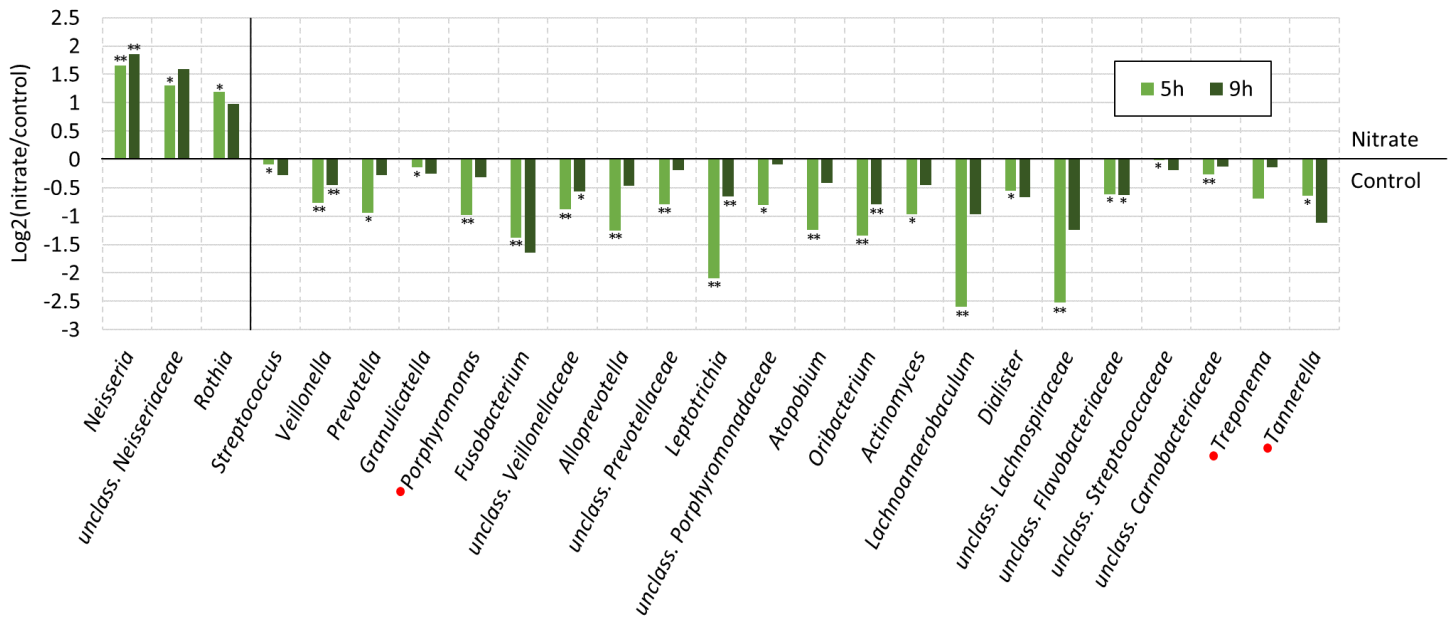

**Supplementary Fig. 3: Changes in biofilm bacterial composition under nitrate conditions (based on Standard Compositional Data Analysis, CODA).** Bar graphs show the log<sub>2</sub> value of the ratio [average abundance nitrate condition]/[average abundance control condition] of 12 donors. Genera shown are those significantly different between the 6.5 mM nitrate and control conditions at 5h or 9h and, additionally, *Treponema*-a clinically relevant genera- was added. The genera that are higher in the nitrate condition are listed first and sorted by their highest average abundance in one of the conditions. After the vertical black stripe, the genera that are lower in the nitrate condition are listed, sorted by their highest average abundance in one of the conditions from highest to lowest (all taxa after unclass. Veillonellaceae had an average abundance of <0.5% in all conditions). Red circles are placed before the genera of periodontitis-associated “red-complex” bacteria. unclass. = unclassified (only shown at family-level); \*adjusted p<0.05 and \*\*adjusted p<0.01 between the control and nitrate conditions, according to an ANCOMII analysis (for the complete dataset, see Supplementary Spreadsheet).

Supplementary Table 2A: OTU classification of genera with significant differences between the nitrate and control conditions

| Genera                                          | Species                                                                | 5h      |       |       |         |       |       | 9h      |       |       |         |       |       |
|-------------------------------------------------|------------------------------------------------------------------------|---------|-------|-------|---------|-------|-------|---------|-------|-------|---------|-------|-------|
|                                                 |                                                                        | Control |       |       | Nitrate |       |       | Control |       |       | Nitrate |       |       |
|                                                 |                                                                        | X/12    | Mean  | SD    | X/12    | M     | SD    | X/12    | Mean  | SD    | X/12    | Mean  | SD    |
| <i>Neisseria</i>                                | NA                                                                     | 11      | 34.77 | 8.75  | 10      | 34.61 | 9.04  | 10      | 42.31 | 9.08  | 10      | 40.61 | 9.07  |
|                                                 | <i>flavescens</i>                                                      | 10      | 25.45 | 10.00 | 12      | 25.85 | 10.04 | 11      | 30.34 | 11.43 | 12      | 26.46 | 9.38  |
|                                                 | <i>subflava</i>                                                        | 8       | 20.99 | 8.91  | 8       | 21.91 | 8.76  | 8       | 18.55 | 7.80  | 8       | 18.68 | 7.39  |
|                                                 | <i>bacilliformis</i>                                                   | 10      | 11.56 | 8.20  | 9       | 8.75  | 7.03  | 5       | 1.89  | 1.29  | 10      | 5.58  | 3.78  |
|                                                 | <i>elongata</i>                                                        | 9       | 4.20  | 2.41  | 8       | 5.32  | 3.56  | 8       | 3.00  | 1.14  | 9       | 4.95  | 2.72  |
|                                                 | <i>subflava</i>   <i>pharyngis</i>                                     | 9       | 1.88  | 0.56  | 8       | 2.20  | 0.69  | 7       | 1.94  | 0.75  | 7       | 2.18  | 0.77  |
|                                                 | <i>pharyngis</i>                                                       | 5       | 0.97  | 0.53  | 7       | 0.39  | 0.18  | 4       | 1.35  | 0.66  | 6       | 0.94  | 0.51  |
|                                                 | Low abun. spp.                                                         | 2       | 0.19  | 0.16  | 5       | 0.97  | 0.61  | 3       | 0.61  | 0.35  | 4       | 0.59  | 0.33  |
| <i>Rothia</i>                                   | <i>aeria</i>   <i>dentocariosa</i>                                     | 11      | 85.06 | 8.09  | 12      | 94.99 | 1.40  | 11      | 88.21 | 8.30  | 11      | 88.75 | 8.19  |
|                                                 | <i>mucilaginoso</i>                                                    | 8       | 6.20  | 2.52  | 8       | 4.13  | 1.30  | 2       | 2.82  | 2.15  | 3       | 1.47  | 1.00  |
|                                                 | <i>aeria</i>                                                           | 3       | 0.38  | 0.23  | 4       | 0.77  | 0.38  | 1       | 0.64  | 0.64  | 2       | 1.30  | 1.19  |
|                                                 | Low abun. spp.                                                         | 1       | 0.03  | 0.03  | 1       | 0.12  | 0.12  | 0       | 0.00  | 0.00  | 1       | 0.15  | 0.15  |
| <i>Streptococcus</i>                            | NA                                                                     | 12      | 55.71 | 2.58  | 12      | 52.99 | 3.61  | 12      | 52.30 | 3.39  | 12      | 54.40 | 2.66  |
|                                                 | <i>anginosus</i>   <i>intermedius</i>                                  | 10      | 8.85  | 3.27  | 10      | 9.93  | 4.12  | 10      | 12.64 | 4.63  | 10      | 10.69 | 3.64  |
|                                                 | <i>vestibularis</i>   <i>salivarius</i>                                | 12      | 8.92  | 2.69  | 11      | 10.77 | 2.96  | 11      | 9.27  | 2.15  | 10      | 9.78  | 3.01  |
|                                                 | <i>parasanguinis_II</i>                                                | 12      | 8.30  | 1.34  | 12      | 10.01 | 1.53  | 12      | 7.32  | 1.63  | 12      | 6.62  | 1.52  |
|                                                 | <i>peroris</i>   <i>lactarius</i>                                      | 12      | 6.41  | 1.16  | 11      | 5.82  | 1.22  | 12      | 3.68  | 0.75  | 11      | 5.00  | 1.43  |
|                                                 | <i>sp._oral_taxon_066</i>   <i>parasanguinis_I</i>                     | 12      | 4.70  | 1.26  | 9       | 2.48  | 0.90  | 12      | 6.66  | 0.65  | 12      | 5.61  | 1.12  |
|                                                 | <i>sanguinis</i>                                                       | 11      | 2.82  | 0.77  | 12      | 3.87  | 1.43  | 10      | 3.64  | 1.77  | 11      | 3.95  | 1.32  |
|                                                 | Low abun. spp.                                                         | 12      | 3.40  | 0.40  | 12      | 3.02  | 0.48  | 12      | 3.58  | 0.47  | 12      | 3.43  | 0.60  |
|                                                 | <i>cristatus</i>                                                       | 8       | 0.91  | 0.55  | 7       | 1.10  | 0.55  | 9       | 0.90  | 0.31  | 6       | 0.53  | 0.18  |
| <i>Veillonella</i>                              | <i>rogosae</i>   <i>parvula</i>                                        | 12      | 34.08 | 7.95  | 12      | 30.20 | 7.05  | 12      | 39.47 | 6.75  | 12      | 31.71 | 6.05  |
|                                                 | <i>parvula</i>   <i>denticariosi</i>                                   | 12      | 13.00 | 2.63  | 12      | 19.58 | 5.22  | 12      | 16.65 | 3.03  | 12      | 21.03 | 3.38  |
|                                                 | <i>atypica</i>                                                         | 12      | 21.01 | 6.65  | 11      | 15.40 | 4.97  | 10      | 15.74 | 4.70  | 11      | 14.98 | 4.68  |
|                                                 | <i>dispar</i>   <i>atypica</i>                                         | 10      | 12.45 | 4.22  | 11      | 10.33 | 3.82  | 11      | 9.97  | 3.75  | 11      | 8.70  | 3.12  |
|                                                 | NA                                                                     | 12      | 8.24  | 2.84  | 12      | 10.67 | 3.37  | 12      | 8.19  | 2.22  | 12      | 11.68 | 2.54  |
|                                                 | <i>parvula</i>                                                         | 12      | 3.53  | 0.65  | 12      | 3.67  | 0.56  | 12      | 3.55  | 0.64  | 12      | 3.96  | 0.54  |
|                                                 | <i>sp._oral_taxon_780</i>                                              | 7       | 1.62  | 0.96  | 6       | 1.71  | 1.40  | 6       | 2.78  | 2.43  | 5       | 1.42  | 1.12  |
|                                                 | <i>rogosae</i>                                                         | 10      | 1.72  | 0.46  | 11      | 1.97  | 0.64  | 12      | 2.05  | 0.31  | 11      | 1.54  | 0.43  |
|                                                 | <i>sp._oral_taxon_917</i>                                              | 5       | 1.22  | 1.14  | 1       | 2.35  | 2.35  | 3       | 0.04  | 0.02  | 3       | 2.10  | 2.08  |
|                                                 | <i>dispar</i>                                                          | 11      | 1.25  | 0.48  | 10      | 1.89  | 0.62  | 12      | 0.94  | 0.29  | 10      | 1.45  | 0.40  |
|                                                 | <i>dispar</i>   <i>parvula</i>                                         | 12      | 1.54  | 0.63  | 10      | 1.65  | 0.60  | 10      | 0.51  | 0.17  | 11      | 0.80  | 0.21  |
|                                                 | Low abun. spp.                                                         | 7       | 0.34  | 0.28  | 3       | 0.57  | 0.52  | 7       | 0.13  | 0.04  | 7       | 0.64  | 0.45  |
|                                                 | <i>Porphyromonas</i>                                                   | NA      | 11    | 35.70 | 4.85    | 9     | 32.85 | 9.26    | 11    | 58.68 | 9.34    | 10    | 48.09 |
| <i>endodontalis</i>   <i>sp._oral_taxon_285</i> |                                                                        | 12      | 42.95 | 7.04  | 10      | 49.83 | 10.17 | 10      | 21.97 | 8.44  | 9       | 28.82 | 9.02  |
| <i>sp._oral_taxon_930</i>                       |                                                                        | 7       | 19.09 | 6.47  | 4       | 7.27  | 3.69  | 8       | 18.84 | 6.92  | 3       | 12.32 | 6.57  |
| <i>sp._oral_taxon_275</i>   <i>catoniae</i>     |                                                                        | 3       | 1.65  | 0.94  | 0       | 0.00  | 0.00  | 1       | 0.51  | 0.51  | 3       | 1.87  | 1.66  |
| Low abun. spp.                                  |                                                                        | 2       | 0.62  | 0.57  | 1       | 0.33  | 0.33  | 0       | 0.00  | 0.00  | 1       | 0.56  | 0.56  |
| <i>pasteri</i>                                  |                                                                        | 0       | 0.00  | 0.00  | 1       | 1.39  | 1.39  | 0       | 0.00  | 0.00  | 0       | 0.00  | 0.00  |
| <i>Fusobacterium</i>                            | NA                                                                     | 12      | 62.01 | 7.84  | 11      | 70.18 | 10.65 | 12      | 66.12 | 9.49  | 10      | 51.38 | 10.42 |
|                                                 | <i>periodonticum</i>                                                   | 8       | 21.27 | 7.06  | 5       | 10.53 | 5.68  | 7       | 21.74 | 7.96  | 8       | 18.68 | 5.24  |
|                                                 | <i>nucleatum_subsp._polymorphum</i>   <i>nucleatum_subsp._animalis</i> | 5       | 14.83 | 6.41  | 2       | 9.77  | 6.80  | 3       | 11.95 | 8.50  | 2       | 12.86 | 8.70  |
|                                                 | <i>nucleatum_subsp._polymorphum</i>   <i>sp._oral_taxon_203</i>        | 1       | 1.04  | 1.04  | 1       | 1.19  | 1.19  | 0       | 0.00  | 0.00  | 0       | 0.00  | 0.00  |
|                                                 | Low abun. spp.                                                         | 2       | 0.85  | 0.63  | 0       | 0.00  | 0.00  | 1       | 0.19  | 0.19  | 1       | 0.42  | 0.42  |

Low abundance spp. are species with <1% average abundance in each condition grouped together. NA is not classified using our criteria.

Supplementary Table 2B: continuation of OTU classification of genera with significant differences between the nitrate and control conditions

| Genera                | Species                                      | 5h      |       |      |         |       |       | 9h      |       |       |         |       |       |
|-----------------------|----------------------------------------------|---------|-------|------|---------|-------|-------|---------|-------|-------|---------|-------|-------|
|                       |                                              | Control |       |      | Nitrate |       |       | Control |       |       | Nitrate |       |       |
|                       |                                              | X/12    | Mean  | SD   | X/12    | M     | SD    | X/12    | Mean  | SD    | X/12    | Mean  | SD    |
| <i>Prevotella</i>     | <i>pallens</i>                               | 12      | 31.23 | 4.81 | 12      | 28.13 | 4.91  | 12      | 21.02 | 4.81  | 12      | 27.23 | 4.86  |
|                       | NA                                           | 12      | 16.37 | 4.76 | 11      | 19.57 | 5.00  | 9       | 10.81 | 3.25  | 7       | 13.77 | 6.14  |
|                       | <i>nigrescens</i>                            | 11      | 11.25 | 3.18 | 12      | 19.48 | 5.89  | 11      | 13.39 | 3.14  | 9       | 10.70 | 3.71  |
|                       | <i>oris</i>                                  | 12      | 7.68  | 2.34 | 10      | 7.33  | 2.03  | 10      | 8.92  | 2.88  | 10      | 10.16 | 4.68  |
|                       | <i>intermedia</i>                            | 10      | 7.74  | 3.42 | 7       | 5.80  | 2.49  | 8       | 6.81  | 3.49  | 5       | 4.12  | 2.37  |
|                       | <i>scopos</i>                                | 7       | 6.49  | 3.79 | 5       | 3.06  | 2.00  | 6       | 8.95  | 6.31  | 6       | 4.42  | 2.93  |
|                       | Low abund. spp.                              | 11      | 4.42  | 1.28 | 10      | 3.69  | 0.87  | 12      | 4.65  | 1.02  | 8       | 3.22  | 1.26  |
|                       | <i>sp._oral_taxon_317 shahii</i>             | 6       | 1.58  | 0.98 | 3       | 1.92  | 1.50  | 5       | 8.72  | 4.49  | 6       | 2.83  | 1.19  |
|                       | <i>sp._oral_taxon_306 sp._oral_taxon_314</i> | 9       | 2.28  | 0.93 | 7       | 1.36  | 0.42  | 7       | 3.15  | 1.04  | 7       | 3.07  | 1.36  |
|                       | <i>sp._oral_taxon_306</i>                    | 9       | 2.51  | 0.84 | 7       | 2.68  | 1.40  | 7       | 0.94  | 0.32  | 5       | 2.15  | 1.29  |
|                       | <i>sp._oral_taxon_472 loescheii</i>          | 5       | 0.52  | 0.39 | 6       | 0.65  | 0.30  | 6       | 2.09  | 1.39  | 7       | 4.87  | 2.77  |
|                       | <i>sp._oral_taxon_942</i>                    | 5       | 1.93  | 1.60 | 2       | 0.57  | 0.54  | 1       | 0.81  | 0.81  | 2       | 4.59  | 3.09  |
|                       | <i>sp._oral_taxon_292 sp._oral_taxon_300</i> | 7       | 0.64  | 0.26 | 5       | 0.94  | 0.57  | 7       | 3.94  | 1.65  | 4       | 0.88  | 0.75  |
|                       | <i>sp._oral_taxon_443</i>                    | 5       | 0.30  | 0.19 | 3       | 0.55  | 0.50  | 6       | 1.14  | 0.43  | 3       | 3.04  | 2.76  |
|                       | <i>histicola sp._oral_taxon_313</i>          | 8       | 0.79  | 0.32 | 5       | 1.57  | 1.15  | 5       | 1.21  | 0.69  | 4       | 0.43  | 0.31  |
|                       | <i>pleuritidis</i>                           | 4       | 0.84  | 0.65 | 3       | 0.62  | 0.49  | 3       | 0.83  | 0.70  | 4       | 1.29  | 0.80  |
|                       | <i>histicola</i>                             | 7       | 1.09  | 0.48 | 6       | 0.89  | 0.40  | 5       | 0.57  | 0.21  | 5       | 0.63  | 0.27  |
|                       | <i>fusca</i>                                 | 2       | 1.02  | 0.70 | 2       | 0.11  | 0.09  | 2       | 0.77  | 0.53  | 2       | 0.89  | 0.63  |
|                       | <i>sp._oral_taxon_313</i>                    | 8       | 1.02  | 0.29 | 5       | 0.71  | 0.37  | 4       | 0.65  | 0.35  | 4       | 0.33  | 0.17  |
| <i>nanceiensis</i>    | 5                                            | 0.33    | 0.21  | 3    | 0.36    | 0.32  | 6     | 0.63    | 0.25  | 2     | 1.38    | 1.31  |       |
| <i>Alloprevotella</i> | <i>sp._oral_taxon_473</i>                    | 11      | 67.26 | 8.74 | 8       | 44.66 | 11.06 | 10      | 65.47 | 11.01 | 12      | 69.60 | 10.82 |
|                       | <i>rava</i>                                  | 10      | 17.38 | 7.99 | 8       | 17.27 | 8.29  | 7       | 6.40  | 3.09  | 7       | 18.33 | 9.38  |
|                       | <i>tannerae</i>                              | 11      | 11.63 | 4.36 | 10      | 27.89 | 10.42 | 8       | 12.36 | 4.39  | 6       | 3.15  | 1.76  |
|                       | <i>sp._oral_taxon_308 sp._oral_taxon_914</i> | 6       | 2.47  | 1.37 | 3       | 4.09  | 2.95  | 5       | 7.22  | 4.11  | 5       | 4.18  | 2.90  |
|                       | <i>sp._oral_taxon_308</i>                    | 4       | 1.23  | 0.78 | 3       | 5.70  | 5.54  | 3       | 4.67  | 4.43  | 3       | 4.73  | 3.08  |
|                       | <i>sp._oral_taxon_912 sp._oral_taxon_913</i> | 1       | 0.02  | 0.02 | 1       | 0.38  | 0.38  | 4       | 3.87  | 2.83  | 0       | 0.00  | 0.00  |
| <i>Leptotrichia</i>   | NA                                           | 12      | 81.79 | 5.54 | 12      | 75.19 | 5.91  | 12      | 75.77 | 5.60  | 12      | 86.17 | 5.03  |
|                       | <i>wadei sp._oral_taxon_417</i>              | 7       | 5.20  | 3.29 | 6       | 5.76  | 2.57  | 6       | 8.11  | 3.91  | 5       | 4.07  | 1.80  |
|                       | <i>hongkongensis</i>                         | 6       | 3.21  | 1.49 | 4       | 8.00  | 3.66  | 6       | 3.14  | 1.15  | 4       | 2.41  | 1.20  |
|                       | <i>sp._oral_taxon_212 sp._oral_taxon_215</i> | 3       | 3.75  | 3.45 | 2       | 3.13  | 2.77  | 5       | 3.90  | 3.21  | 2       | 4.17  | 3.91  |
|                       | <i>sp._oral_taxon_215</i>                    | 4       | 2.33  | 1.94 | 3       | 2.72  | 1.93  | 8       | 4.60  | 1.92  | 1       | 0.98  | 0.98  |
|                       | <i>sp._oral_taxon_498</i>                    | 6       | 2.17  | 0.98 | 5       | 3.34  | 1.58  | 5       | 2.03  | 0.79  | 2       | 0.98  | 0.81  |
|                       | <i>shahii sp._oral_taxon_879</i>             | 5       | 1.43  | 0.77 | 3       | 1.27  | 0.79  | 3       | 1.11  | 0.62  | 1       | 0.83  | 0.83  |
|                       | Low abundance spp.                           | 2       | 0.13  | 0.09 | 2       | 0.58  | 0.40  | 5       | 1.34  | 0.76  | 2       | 0.38  | 0.26  |
| <i>Oribacterium</i>   | <i>sinus parvum</i>                          | 12      | 71.78 | 3.87 | 11      | 69.96 | 8.76  | 11      | 66.41 | 8.15  | 12      | 86.58 | 5.28  |
|                       | <i>parvum</i>                                | 10      | 14.52 | 2.99 | 9       | 16.42 | 8.13  | 10      | 10.24 | 2.53  | 7       | 9.02  | 3.81  |
|                       | NA                                           | 9       | 7.19  | 2.31 | 7       | 4.62  | 1.47  | 10      | 8.78  | 2.77  | 2       | 1.21  | 0.99  |
|                       | <i>sp._oral_taxon_078</i>                    | 5       | 4.44  | 2.27 | 4       | 5.14  | 3.29  | 3       | 3.80  | 3.03  | 1       | 1.47  | 1.47  |
|                       | <i>sinus</i>                                 | 6       | 1.91  | 0.82 | 6       | 3.43  | 1.65  | 4       | 2.43  | 1.43  | 2       | 1.72  | 1.56  |
|                       | Low abundance spp.                           | 2       | 0.16  | 0.12 | 3       | 0.44  | 0.27  | 0       | 0.00  | 0.00  | 0       | 0.00  | 0.00  |

Low abundance spp. are species with <1% average abundance in each condition grouped together. NA is not classified using our criteria.

Supplementary Table 3: OTU classification of dominant and clinically relevant genera that did not change significantly on genera-level

|                        |                                                       | 5h      |       |       |         |       |       | 9h      |       |       |         |       |       |
|------------------------|-------------------------------------------------------|---------|-------|-------|---------|-------|-------|---------|-------|-------|---------|-------|-------|
|                        |                                                       | Control |       |       | Nitrate |       |       | Control |       |       | Nitrate |       |       |
| Genera                 | Species                                               | X/12    | Mean  | SD    | X/12    | M     | SD    | X/12    | Mean  | SD    | X/12    | Mean  | SD    |
| <i>Haemophilus</i>     | <i>sputorum</i>                                       | 12      | 42.36 | 9.24  | 9       | 48.71 | 11.41 | 11      | 44.30 | 8.20  | 11      | 49.13 | 10.84 |
|                        | NA                                                    | 12      | 28.17 | 7.89  | 11      | 16.80 | 7.39  | 11      | 18.09 | 5.47  | 11      | 16.91 | 6.93  |
|                        | <i>pittmaniae</i>                                     | 10      | 17.16 | 8.21  | 10      | 15.07 | 8.61  | 10      | 19.32 | 7.51  | 10      | 17.01 | 8.97  |
|                        | <i>sp._oral_taxon_036</i>                             | 9       | 4.75  | 3.16  | 8       | 4.64  | 3.69  | 9       | 4.53  | 2.42  | 8       | 2.65  | 1.82  |
|                        | <i>Parainfluenzae</i>                                 | 10      | 1.60  | 0.69  | 9       | 1.41  | 0.56  | 9       | 9.55  | 8.26  | 10      | 1.13  | 0.60  |
|                        | <i>paraphrohaemolyticus</i>   <i>parahaemolyticus</i> | 6       | 3.91  | 2.92  | 6       | 3.37  | 2.74  | 6       | 2.60  | 1.59  | 7       | 2.40  | 1.65  |
|                        | Low abundance spp.                                    | 11      | 2.05  | 0.46  | 10      | 1.67  | 0.43  | 10      | 1.62  | 0.41  | 10      | 2.42  | 0.76  |
| <i>Gemella</i>         | NA                                                    | 12      | 85.20 | 2.89  | 12      | 85.71 | 2.18  | 12      | 88.38 | 0.82  | 12      | 86.09 | 3.42  |
|                        | <i>haemolysans</i>                                    | 12      | 6.53  | 0.63  | 11      | 6.50  | 0.73  | 12      | 5.78  | 0.36  | 12      | 5.96  | 0.53  |
|                        | <i>haemolysans</i>   <i>sanguinis</i>                 | 12      | 4.34  | 0.74  | 12      | 3.92  | 0.53  | 10      | 2.94  | 0.45  | 12      | 3.71  | 0.64  |
|                        | <i>sanguinis</i>                                      | 11      | 2.68  | 1.53  | 12      | 3.14  | 1.77  | 10      | 1.38  | 0.41  | 9       | 1.30  | 0.68  |
|                        | <i>morbilorum</i>                                     | 11      | 1.25  | 0.42  | 9       | 0.74  | 0.44  | 11      | 1.52  | 1.01  | 9       | 2.95  | 2.05  |
| <i>Granulicatella</i>  | <i>adiacens</i>                                       | 12      | 64.98 | 7.96  | 12      | 74.15 | 8.08  | 12      | 76.70 | 9.06  | 12      | 77.55 | 7.03  |
|                        | <i>elegans</i>                                        | 10      | 35.02 | 7.96  | 8       | 25.85 | 8.08  | 8       | 23.30 | 9.06  | 8       | 22.45 | 7.03  |
| <i>Aggregatibacter</i> | NA                                                    | 12      | 89.67 | 5.75  | 11      | 77.80 | 9.57  | 11      | 85.03 | 7.99  | 10      | 78.11 | 10.66 |
|                        | <i>sp._oral_taxon_458</i>                             | 6       | 9.27  | 5.88  | 6       | 3.71  | 2.20  | 6       | 2.73  | 1.16  | 5       | 0.94  | 0.43  |
|                        | <i>sp._oral_taxon_512</i>   <i>segnis</i>             | 3       | 0.34  | 0.19  | 6       | 6.68  | 4.90  | 6       | 2.83  | 1.29  | 6       | 2.55  | 0.87  |
|                        | <i>sp._oral_taxon_513</i>   <i>sp._oral_taxon_898</i> | 1       | 0.19  | 0.19  | 0       | 0.00  | 0.00  | 0       | 0.00  | 0.00  | 2       | 8.36  | 8.33  |
|                        | <i>aphrophilus</i>   <i>paraphrophilus</i>            | 2       | 0.46  | 0.44  | 3       | 2.64  | 1.78  | 3       | 0.14  | 0.08  | 2       | 0.54  | 0.45  |
|                        | Low abundance spp.                                    | 2       | 0.08  | 0.07  | 1       | 0.83  | 0.83  | 3       | 0.93  | 0.83  | 3       | 1.17  | 1.03  |
| <i>Treponema</i>       | NA                                                    | 9       | 55.07 | 11.75 | 7       | 33.35 | 11.20 | 3       | 17.01 | 9.52  | 5       | 26.88 | 10.45 |
|                        | <i>sp._oral_taxon_257</i>                             | 4       | 10.51 | 4.64  | 3       | 4.57  | 2.66  | 1       | 2.43  | 2.43  | 2       | 7.14  | 4.90  |
|                        | <i>sp._oral_taxon_262</i>                             | 3       | 1.56  | 0.93  | 3       | 3.86  | 2.79  | 2       | 3.82  | 2.88  | 2       | 4.17  | 2.99  |
|                        | <i>sp._oral_taxon_249</i>                             | 0       | 0.00  | 0.00  | 1       | 1.39  | 1.39  | 1       | 8.33  | 8.33  | 0       | 0.00  | 0.00  |
|                        | <i>sp._oral_taxon_234</i>   <i>sp._oral_taxon_237</i> | 3       | 2.63  | 1.68  | 3       | 5.68  | 3.18  | 0       | 0.00  | 0.00  | 0       | 0.00  | 0.00  |
|                        | <i>sp._oral_taxon_246</i>   <i>sp._oral_taxon_247</i> | 0       | 0.00  | 0.00  | 1       | 1.39  | 1.39  | 0       | 0.00  | 0.00  | 1       | 2.78  | 2.78  |
|                        | <i>sp._oral_taxon_231</i>                             | 0       | 0.00  | 0.00  | 0       | 0.00  | 0.00  | 1       | 1.39  | 1.39  | 1       | 1.39  | 1.39  |
|                        | <i>sp._oral_taxon_508</i>                             | 1       | 0.95  | 0.95  | 1       | 1.67  | 1.67  | 0       | 0.00  | 0.00  | 0       | 0.00  | 0.00  |
|                        | Low abundance spp.                                    | 1       | 0.48  | 0.48  | 1       | 1.39  | 1.39  | 0       | 0.00  | 0.00  | 1       | 0.69  | 0.69  |
|                        | <i>sp._oral_taxon_237</i>                             | 1       | 1.04  | 1.04  | 1       | 1.39  | 1.39  | 0       | 0.00  | 0.00  | 0       | 0.00  | 0.00  |
| <i>Tannerella</i>      | NA                                                    | 6       | 34.40 | 12.47 | 5       | 27.64 | 11.18 | 6       | 41.67 | 13.88 | 5       | 38.89 | 14.11 |
|                        | <i>forsythia</i>                                      | 7       | 48.93 | 13.32 | 7       | 39.03 | 12.63 | 3       | 22.92 | 12.10 | 2       | 11.11 | 8.54  |
|                        | <i>sp._oral_taxon_286</i>                             | 0       | 0.00  | 0.00  | 0       | 0.00  | 0.00  | 1       | 2.08  | 2.08  | 0       | 0.00  | 0.00  |

Low abundance spp. are species with <1% average abundance in each condition grouped together. NA is not classified using our criteria.

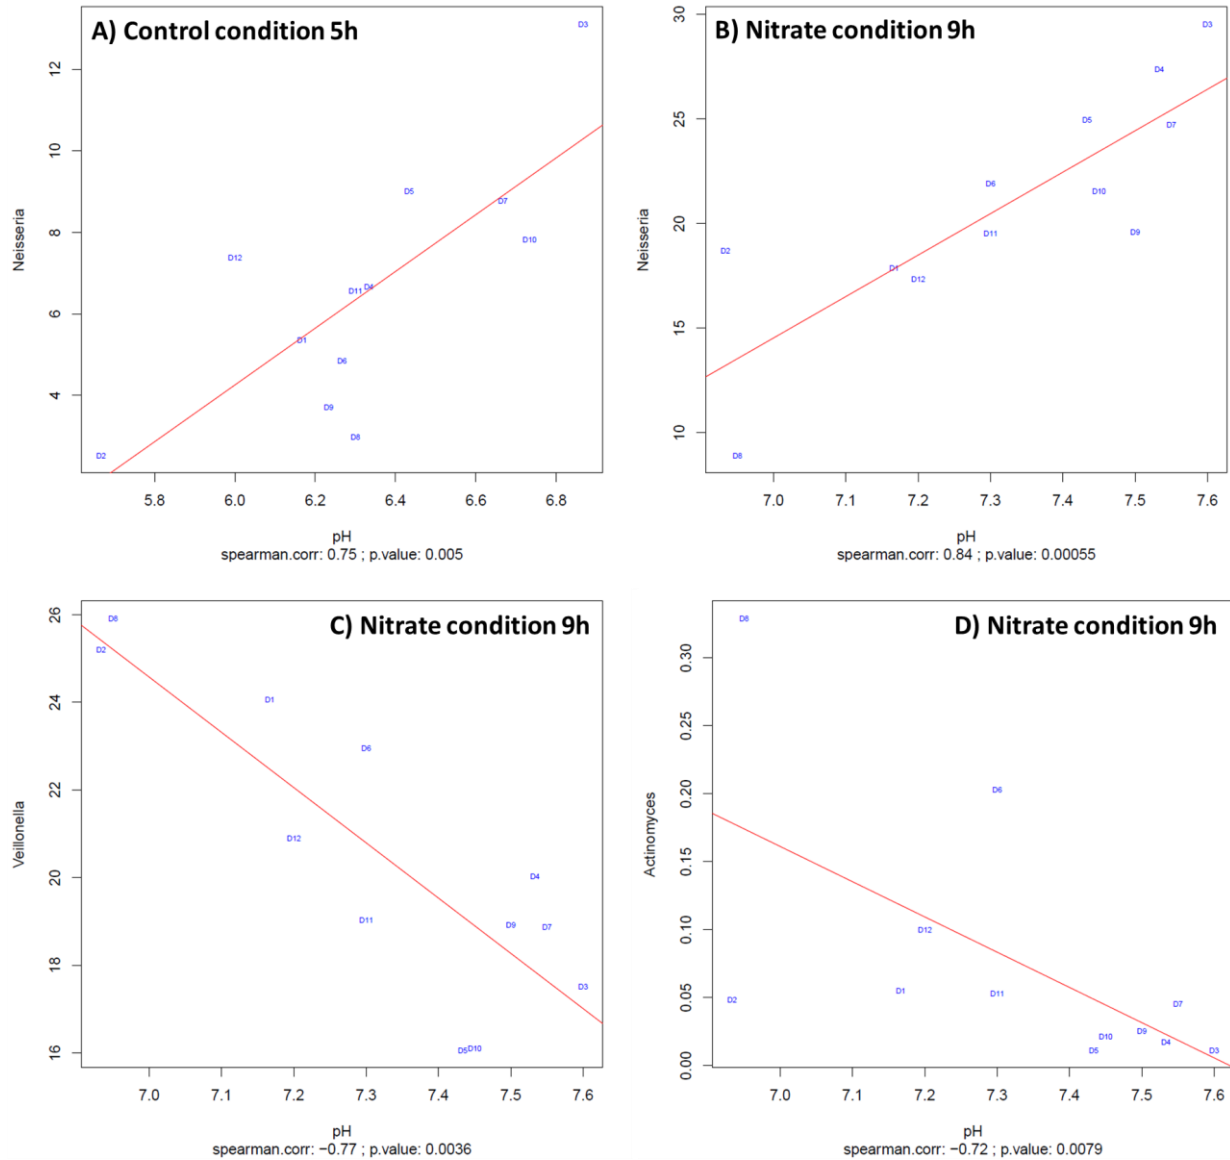

**Supplementary Fig. 4: Significant correlations between genera and pH.** All significant correlations (adjusted  $p < 0.05$ ) between classified genera and pH are shown. A) Correlation between *Neisseria* and pH in the control condition at 5h. In the other sections, the correlations between *Neisseria* (B), *Veillonella* (C) and *Actinomyces* (D) are shown in the nitrate condition at 9h. In the graphs, unadjusted p-values are shown. The adjusted p-values for A, B, C and D were 0.025, 0.007, 0.016 and 0.017, respectively.
